# Supplementary material
Source: PubMed Central journal article supplement (PMC5010446)
Supplement: NIHMS793640-supplement-01.pdf [file NIHMS793640-supplement-01.pdf]

1

2

3

4

5

6

# **Supplementary Appendix**

7 **I) Introduction**8 **Table 1.** Causes Of Increasing High Bone Mass In Adults

9

---

Dysplasias

Osteopetrosis  
 Engelmann disease  
 Endosteal hyperostosis  
     Van Buchem disease  
     Sclerosteosis  
 Craniodiaphyseal dysplasia  
 Craniometaphyseal dysplasia  
 Melorheostosis  
 Mixed-sclerosing-bone-dysplasia

---

## Metabolic

Skeletal fluorosis  
 Heavy metal poisoning  
 Hypervitaminosis A, D  
 Hyper- and hypoparathyroidism  
 Renal osteodystrophy  
 Hypophosphatemic osteomalacia  
 LRP5 activation  
 Milk-alkali syndrome

---

## Other

Myelofibrosis  
 Mastocytosis  
 Sarcoidosis  
 Skeletal metastases  
 Fibrogenesis imperfecta ossium  
 Hepatitis C-associated osteosclerosis  
 Ionizing radiation  
 Lymphoma  
 Multiple myeloma  
 Osteonecrosis  
 Paget bone disease

---

10

11 Reproduced from reference #1-3

12

## 13 II) Material and Methods

### 14 A) Serum Multiplex Biomarker Profiling:

15 We have used SMBP to characterize the biochemical disturbances of heritable metabolic  
16 bone diseases.<sup>(10)</sup> Here we contrasted our patient's values to values from 36 control sera  
17 acquired at Shriners Hospital for Children, St. Louis, MO, USA. Batch assays were used to  
18 examine aliquots of serum from healthy children and adults. At Amgen, the aliquots were  
19 thawed once for the patient together with sera multiple assays (**Supplementary Table 2**) that  
20 were completed within 72 hours using the manufacturer's protocols. Sclerostin (SOST) and  
21 dickkopf1 (DKK-1) were measured using custom ELISAs developed at Amgen Inc. (Thousand  
22 Oaks, CA, USA). Commercial or custom-made Luminex-based microbead multiplex kits  
23 (Millipore/Linco, St. Charles, MO, USA) were used for osteopontin (OPN), osteocalcin (OCN),  
24 receptor activator of NF- $\kappa$ B ligand (RANKL), osteoprotegerin (OPG), transforming growth  
25 factor- $\beta$  (TGF $\beta$ ), adiponectin, fibroblast growth factor 23 (FGF-23), seven major cytokines  
26 including interleukin (IL) 6, and matrix metalloproteinase (MMP) 1, 3, 7, 8, and 13. ELISA kits  
27 were used for prostaglandin E<sub>2</sub> (PGE<sub>2</sub>), insulin-like growth factor 1 (IGF1), and bone turnover  
28 markers (BTMs) including bone-specific alkaline phosphatase (BAP), tartrate-resistant acid  
29 phosphatase (TRACP5b), and collagen formation/degradation products such as CICP/CTX1,  
30 respectively. The raw data were acquired in mean fluorescence intensity units using FlexMap 3D  
31 (Luminex Corp, Austin, TX, USA). For the ELISAs, the initial measurements were collected as  
32 optical density units at a specific wave length using a SpectraMax M5 plate reader (Molecular  
33 Devices, Sunnyvale, CA, USA). Conversion of the results to concentration units was performed  
34 using SoftMax Pro software (Molecular Devices) for the regression analysis of corresponding  
35 standard curves.

36 To create the SMBP reference ranges, we considered control results for < 18 years-of-age  
37 "pediatric" values, and  $\geq$  18 years-of age "adult" values. To assess our patient's results, we  
38 regarded the normal range as the 10<sup>th</sup> – 90<sup>th</sup> percentile using the information from the eight  
39 pre-menopausal women with matching ages of 33 – 45 years.

40

41 **Table 2.**

## 42 Assays For Serum Multiplex Biomarker Profile

43

| Test | Kit                                                   | Manufacturer or Distributor | Location                 | Catalog #       | Limit of Detection |
|------|-------------------------------------------------------|-----------------------------|--------------------------|-----------------|--------------------|
| 1    | Human MMP-3 Panel                                     | Affymetrix                  | Santa Clara, CA          | PC1001M         | 0.4 ng/ml          |
| 2    | Human MMP 4-Plex Panel                                | “                           | “                        | PC1004M         | 15-30 pg/ml        |
| 3    | Cathepsin K                                           | ALPCO                       | Salem, NH                | 04-BI-20432     | 26 pg/ml           |
| 4    | PGE Metabolite Kit (all species)                      | Cayman Chemical             | Ann Arbor, MI            | 514531          | 20 pg/ml           |
| 5    | Human C2C (CTXII)                                     | IBEX                        | Montreal, Quebec, Canada | 60-1001-001     | 22 ng/ml           |
| 6    | Serum CrossLaps (CTXI)                                | IDS                         | Fountain Hills, AZ       | AC-02F1         | 0.04 ng/ml         |
| 7    | Bone TRAP (Human)                                     | “                           | “                        | SB-TR201R       | 1.0 U/L            |
| 8    | Human CICP (c-terminal propeptide of collagen type I) | Quidel                      | San Diego, CA            | 8003            | 2.4 ng/ml          |
| 9    | Human BAP (bone specific ALP)                         | “                           | “                        | 8012            | 1.4 U/L            |
| 10   | Human Adiponectin MagPlex                             | Millipore                   | Billerica, MA            | HADK1MAG-61K-01 | 22 ng/ml           |
| 11   | Human RANKL                                           | “                           | “                        | HBN-51K-1RANKL  | 9.6 pg/ml          |
| 12   | Human MCP-1 MagPlex                                   | “                           | “                        | HCYTOMAG-60K-01 | 1.9 pg/ml          |
| 13   | Human SOST                                            | “                           | “                        | SPR348          | 5 pg/ml            |
| 14   | TGFB1                                                 | “                           | “                        | TGFB-64K-01     | 0.3 ng/ml          |
|      | Human MagPlex 6-Plex OPG/OC/OPN/PTH/FGF23/DKK-1       | “                           | “                        | HBNMAG-51K-06   | See Below          |
| 15   | OPG                                                   | “                           | “                        | “               | 3.8 pg/ml          |
| 16   | OC                                                    | “                           | “                        | “               | 0.137 ng/ml        |
| 17   | OPN                                                   | “                           | “                        | “               | 0.076 ng/ml        |
| 18   | PTH                                                   | “                           | “                        | “               | 3.9 pg/ml          |
| 19   | FGF-23                                                | “                           | “                        | “               | 16 pg/ml           |
| 20   | DKK-1                                                 | “                           | “                        | “               | 0.003 ng/ml        |

44

45

46

47

48 **Table 3.**

## 49 Patient's Serum Multiplex Biomarker Profiling

| Test # | Marker      | Units | Control Range                                    |      |       | Patient <sup>+</sup> |
|--------|-------------|-------|--------------------------------------------------|------|-------|----------------------|
|        |             |       | 10 <sup>th</sup> -90 <sup>th</sup><br>Percentile | Mean | SD    |                      |
| 1      | CICP        | ng/ml | 27.3 – 144.3                                     | 82.7 | 40.4  | <b>152.5</b>         |
| 2      | Bone ALP    | U/L   | 21.3 – 48.8                                      | 31   | 10.1  | 32.7                 |
| 3      | TRACP5b     | U/L   | 1.4 – 5.0                                        | 2.9  | 0.4   | 3.9                  |
| 4      | CTXI        | ng/ml | 0.25 – 0.67                                      | 0.46 | 0.14  | 0.61                 |
| 5      | CTSK        | pg/ml | 10.0 – 349                                       | 60.9 | 118.8 | <b>590</b>           |
| 6      | TGFβ1       | ng/ml | 38.0 – 73.2                                      | 46.5 | 11.8  | <b>30.2</b>          |
| 7      | RANKL       | pg/ml | 4.0 – 10.7                                       | 4.8  | 2.4   | <b>44.9</b>          |
| 8      | SOST        | pg/ml | 181 – 756                                        | 435  | 169   | <b>1242</b>          |
| 9      | OC          | ng/ml | 13.7 – 31.5                                      | 19.5 | 6.0   | 17.1                 |
| 10     | OPN         | ng/ml | 3.4 – 25.5                                       | 11.4 | 7.2   | <b>29.9</b>          |
| 11     | OPG         | ng/ml | 199 – 480                                        | 317  | 108   | 271                  |
| 12     | DKK-1       | ng/ml | 2.0 – 4.6                                        | 3.0  | 0.9   | <b>1.9</b>           |
| 13     | PTH         | pg/ml | 28.7 – 92.0                                      | 51.2 | 22.1  | 89.0                 |
| 14     | FGF-23      | pg/ml | 25.6 – 46.3                                      | 35.4 | 7.4   | 29.7                 |
| 15     | MCP-1       | pg/ml | 335 – 1724                                       | 927  | 446   | 638                  |
| 16     | C2C         | ng/ml | 169 – 322                                        | 248  | 58    | 251                  |
| 17     | PGE2        | pg/ml | 10.0 – 82.5                                      | 46.6 | 26.3  | 74.2                 |
| 18     | Adiponectin | ug/ml | 10.3 – 218.1                                     | 83.5 | 73.2  | 38.3                 |
| 19     | MMP-1       | pg/ml | 282 – 878                                        | 570  | 205   | 284                  |
| 20     | MMP-7       | pg/ml | 211.4 – 834.5                                    | 514  | 219   | <b>2126</b>          |
| 21     | MMP-8       | pg/ml | 26.4 – 70.5                                      | 45.2 | 17.7  | 47.2                 |
| 22     | MMP-3       | ng/ml | 5.1 – 10.5                                       | 7.1  | 1.9   | <b>52.0</b>          |

50

51 Controls = eight 33 to 45 year old women with normal range of 10<sup>th</sup> – 90<sup>th</sup> percentile values.52 <sup>+</sup>Abnormal results are highlighted in bold italics.

53

54 **Figure 1.**

55 Bone scan.

56 Anterior and posterior whole-body bone scintigraphy images demonstrate increased  
57 radionuclide uptake in several thoracic vertebral bodies, and more focally in the right sacrum,  
58 seen best on the posterior image. No abnormal appendicular skeleton radionuclide uptake was  
59 noted to correlate with the long bone findings on radiographs.

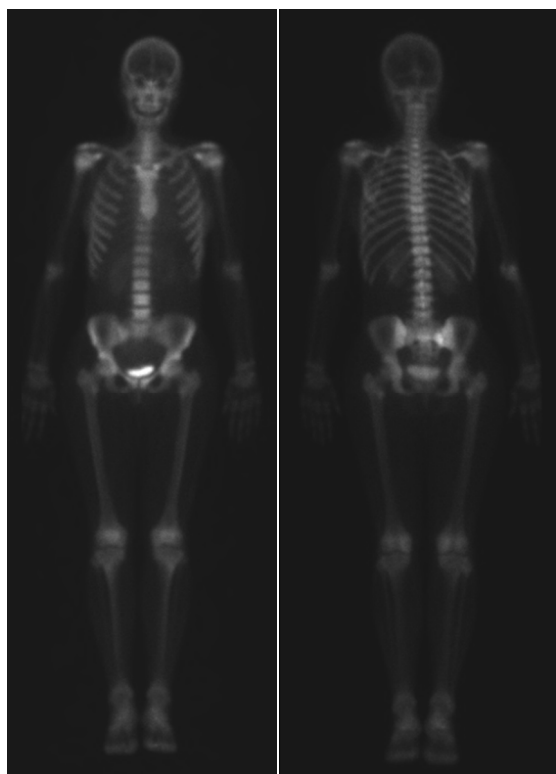

60

61

62

63 **Figure 2.**

64 Serum Multiplex Biomarker Profiling.

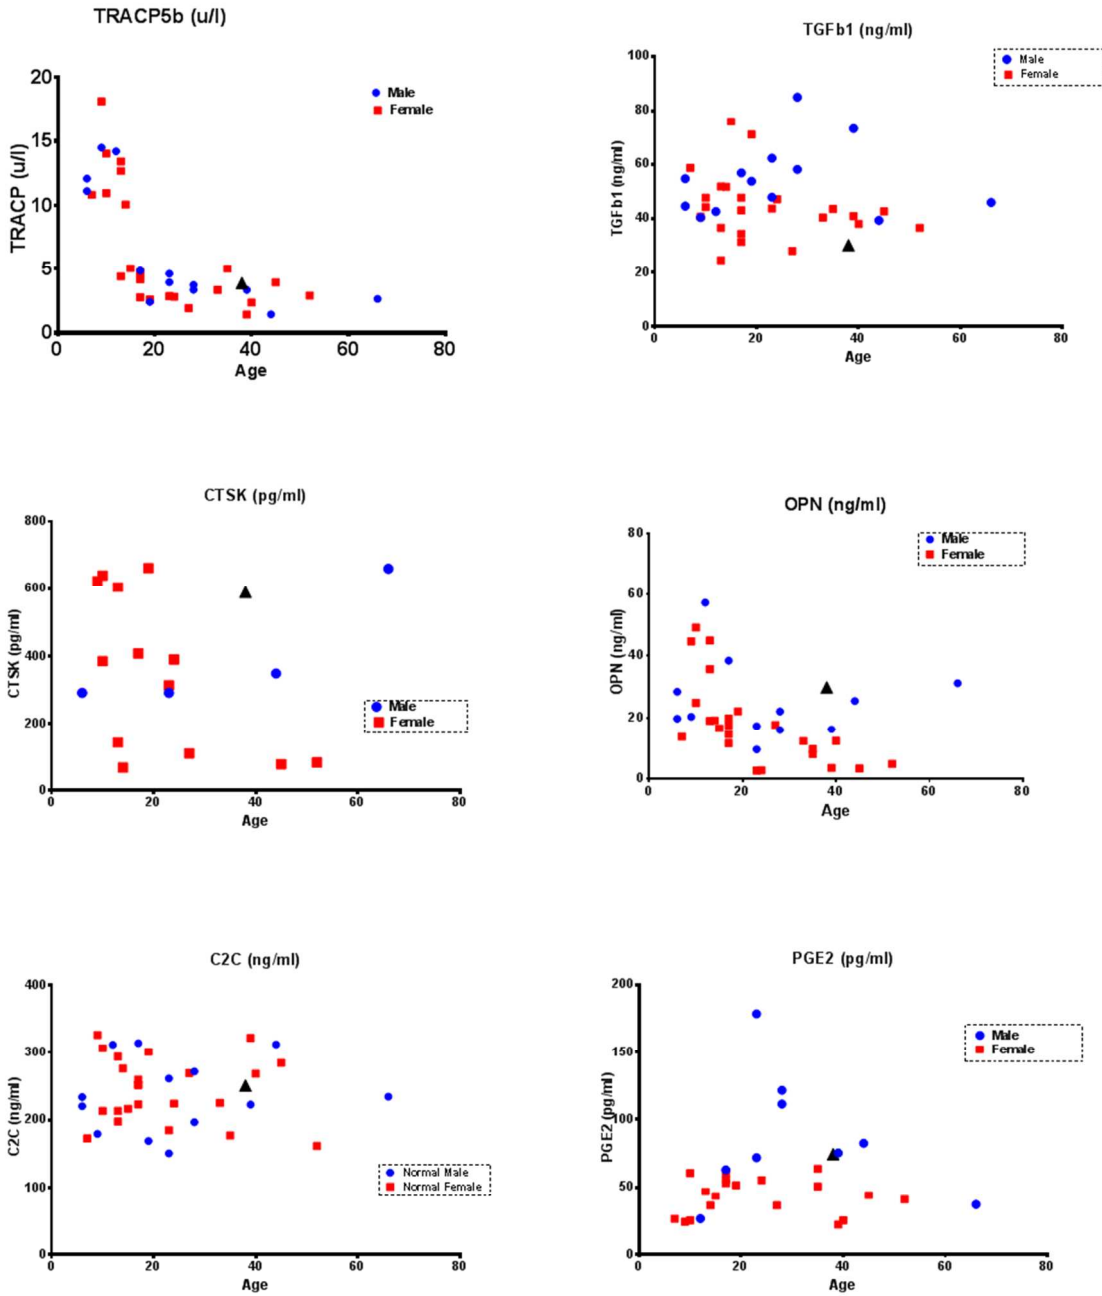

65

66

67

68

69

70 **Figure 2 (continued)**

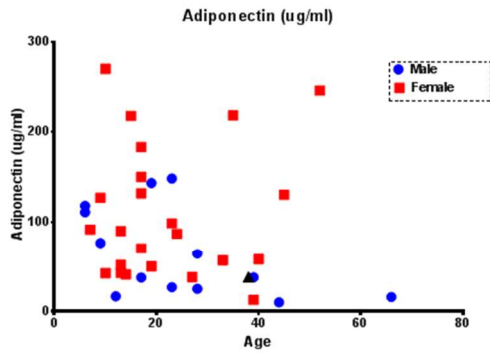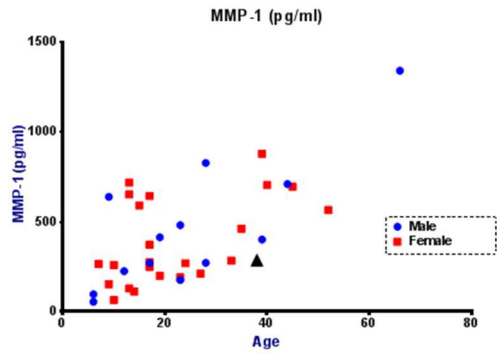

71

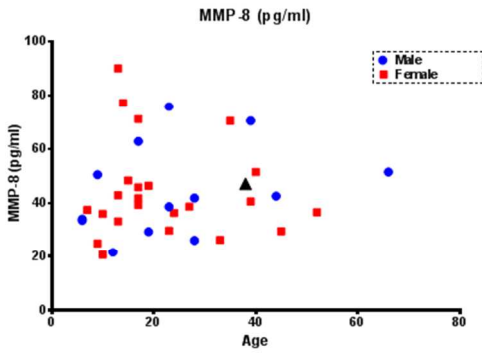

72

73
